# Supplementary material
Source: PubMed Central journal article supplement (PMC5411505)

## DISTANCE-BASED INTRACLASS CORRELATION COEFFICIENT (ICC)

Consider the simple random effects model

$$y_{ij} = \mu + \alpha_j + \epsilon_{ij}, \quad i = 1, \dots, N$$

where  $y_{ij}$  is the observed measurement for  $i$ th subject and  $j$ th replicate measurement,  $\mu$  is the population mean,  $\alpha_j \sim N(0, \sigma_b^2)$  is the subject-level random effect shared by all measurements for  $i$ th subject and  $\epsilon_{ij} \sim N(0, \sigma_\epsilon^2)$  is the measurement error.  $\sigma_b^2$  and  $\sigma_\epsilon^2$  reflect biological and technical variability respectively. The ICC is then defined as

$$ICC = \frac{\sigma_b^2}{\sigma_b^2 + \sigma_\epsilon^2}.$$

To estimate  $\sigma_\epsilon^2$ ,  $\sigma_b^2$ , we replace  $E(WSS)$ ,  $E(TSS)$  with sample  $WSS$ ,  $TSS$ . For pairwise distances, the within-subject sum of squares (WSS) is defined in terms of the sum of the squares of distances within subjects

$$WSS_d = \sum_{i=1}^N \sum_{j,k \in \mathcal{A}(i), j>k} d_{jk}^2/n_i,$$

where  $\mathcal{A}(i)$  contains the indices for samples from subject  $i$ , and the total sum of squares (TSS) is defined as

$$TSS_d = \sum_{j>k} d_{jk}^2/n.$$

It is easy to verify, when the distance is Euclidean,  $WSS_d$  and  $TSS_d$  is reduced to  $WSS$  and  $TSS$ . Thus we have the distance-based ICC estimate as

$$dICC = \frac{\hat{\sigma}_b^2}{\hat{\sigma}_b^2 + \hat{\sigma}_\epsilon^2},$$

where

$$(1) \quad \begin{aligned} \hat{\sigma}_\epsilon^2 &= \frac{WSS_d}{\sum_i (n_i - 1)} \\ \hat{\sigma}_b^2 &= \frac{TSS_d - (n - 1)\hat{\sigma}_\epsilon^2}{n - m}. \end{aligned}$$

With this definition, we can see the  $dICC \in (0, 1)$  and is comparable to the univariate  $ICC$ .

Reference: Distance-based Intraclass Correlation Coefficient for Complex Multivariate Measurements. Chen J. et al., to be submitted.

## SUPPLEMENTAL FIGURE LEGENDS

Supplemental Figure 1. Principal coordinates analysis plot of the unweighted UniFrac distance by subject after removal of outliers.

Supplemental Figure 2. Percent of microbial variability explained by subject, sample collection type (treatment), and day of freezing was calculated using a distance-based coefficient of determination  $R^2$  for beta-diversity estimates from unweighted UniFrac, generalized UniFrac, weighted UniFrac, and Bray-Curtis (BC) distance.

Supplemental Figure 3. Average alpha diversity for the fecal collection methods estimated with observed OTUs (3A) and the Shannon index (3B).

Supplemental Figure 4. Relative abundance at the phylum level by individual for Day 0 replicates (4A) and averaged for each collection method and freezing timepoint (4B).

Supplemental Figure 5. Technical reproducibility of Day 0 replicates (5A) and Day 4 replicates (5B) for the relative abundance at the genus level by fecal sample collection method using intraclass correlation coefficients.

Supplemental Figure 6. Stability of fecal samples collection methods (i.e., Day 4 fecal samples compared to Day 0 fecal samples) for the relative abundance at the genus level by sample collection method using intraclass correlation coefficients.

Supplemental Figure 7. Accuracy of Day 0 fecal samples compared to the “gold standard” no solution sample frozen immediately. Intraclass correlation coefficients (7A) and Spearman correlations (7B) were calculated for the relative abundance at the genus level by sample collection method.

## UniFrac distance

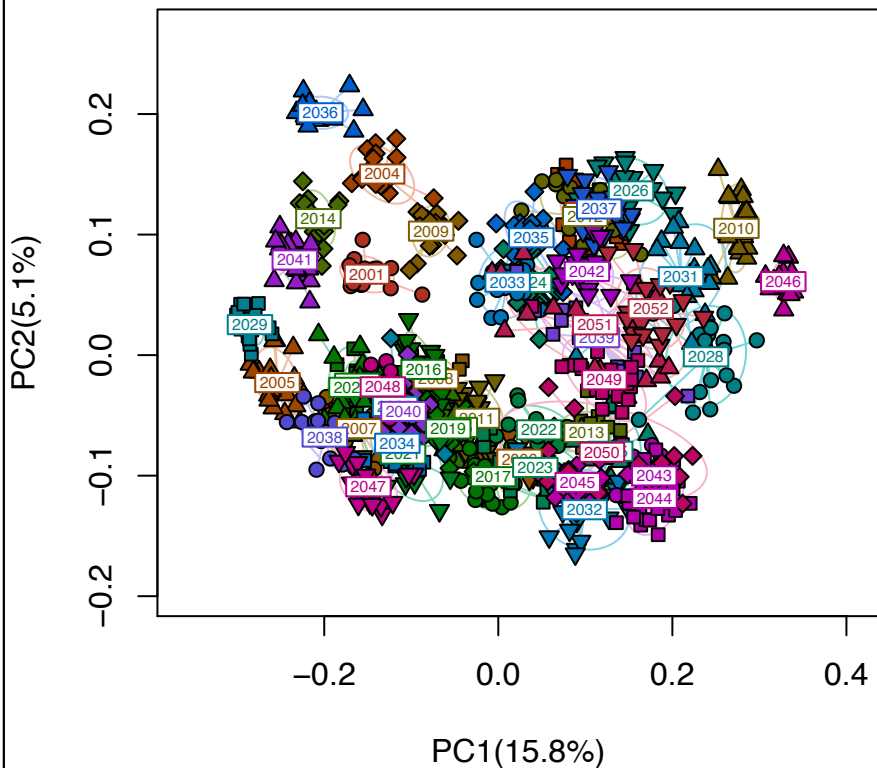

Supplemental Figure 2

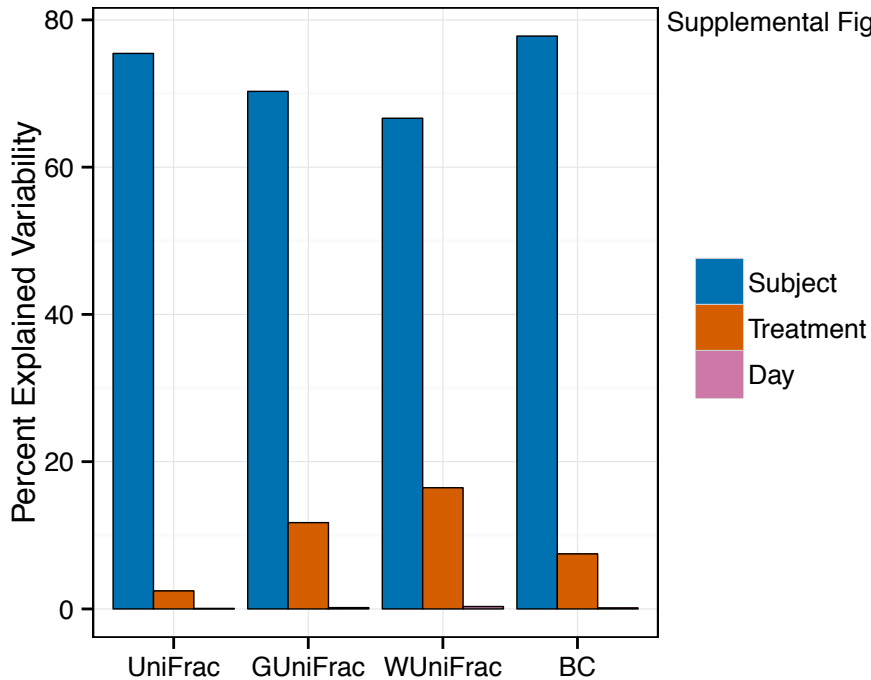

Supplemental Figure 3A

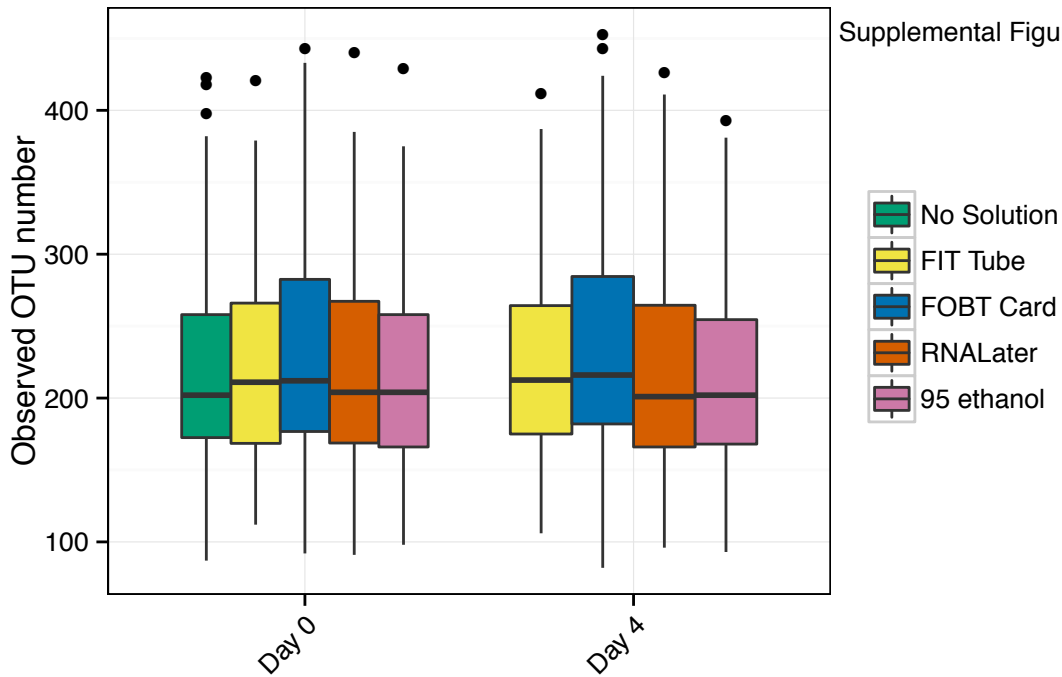

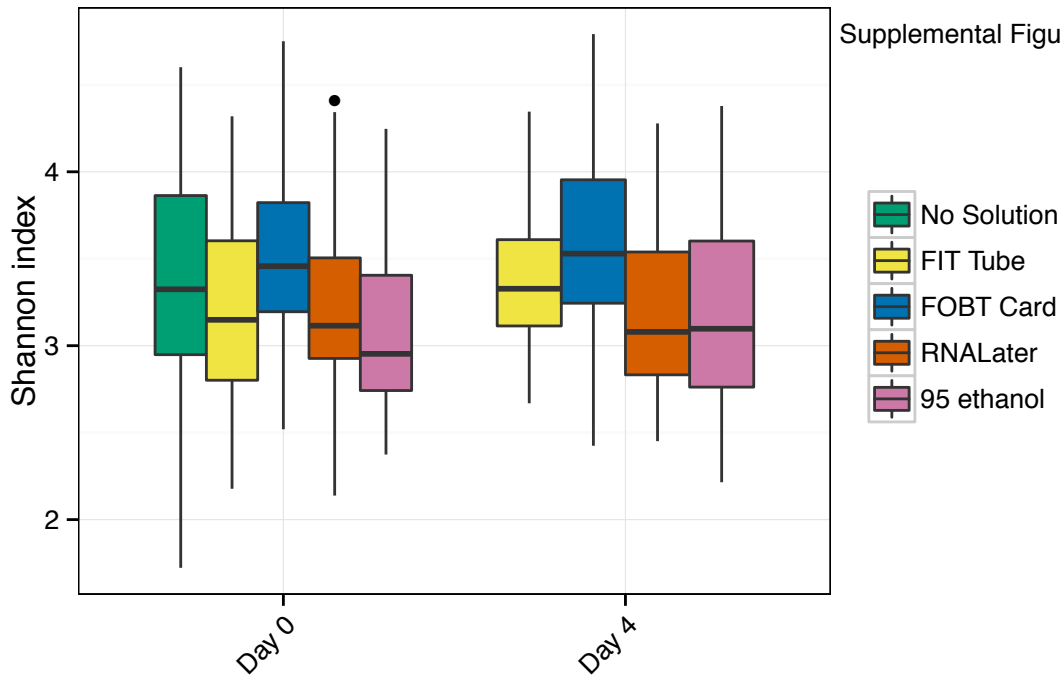

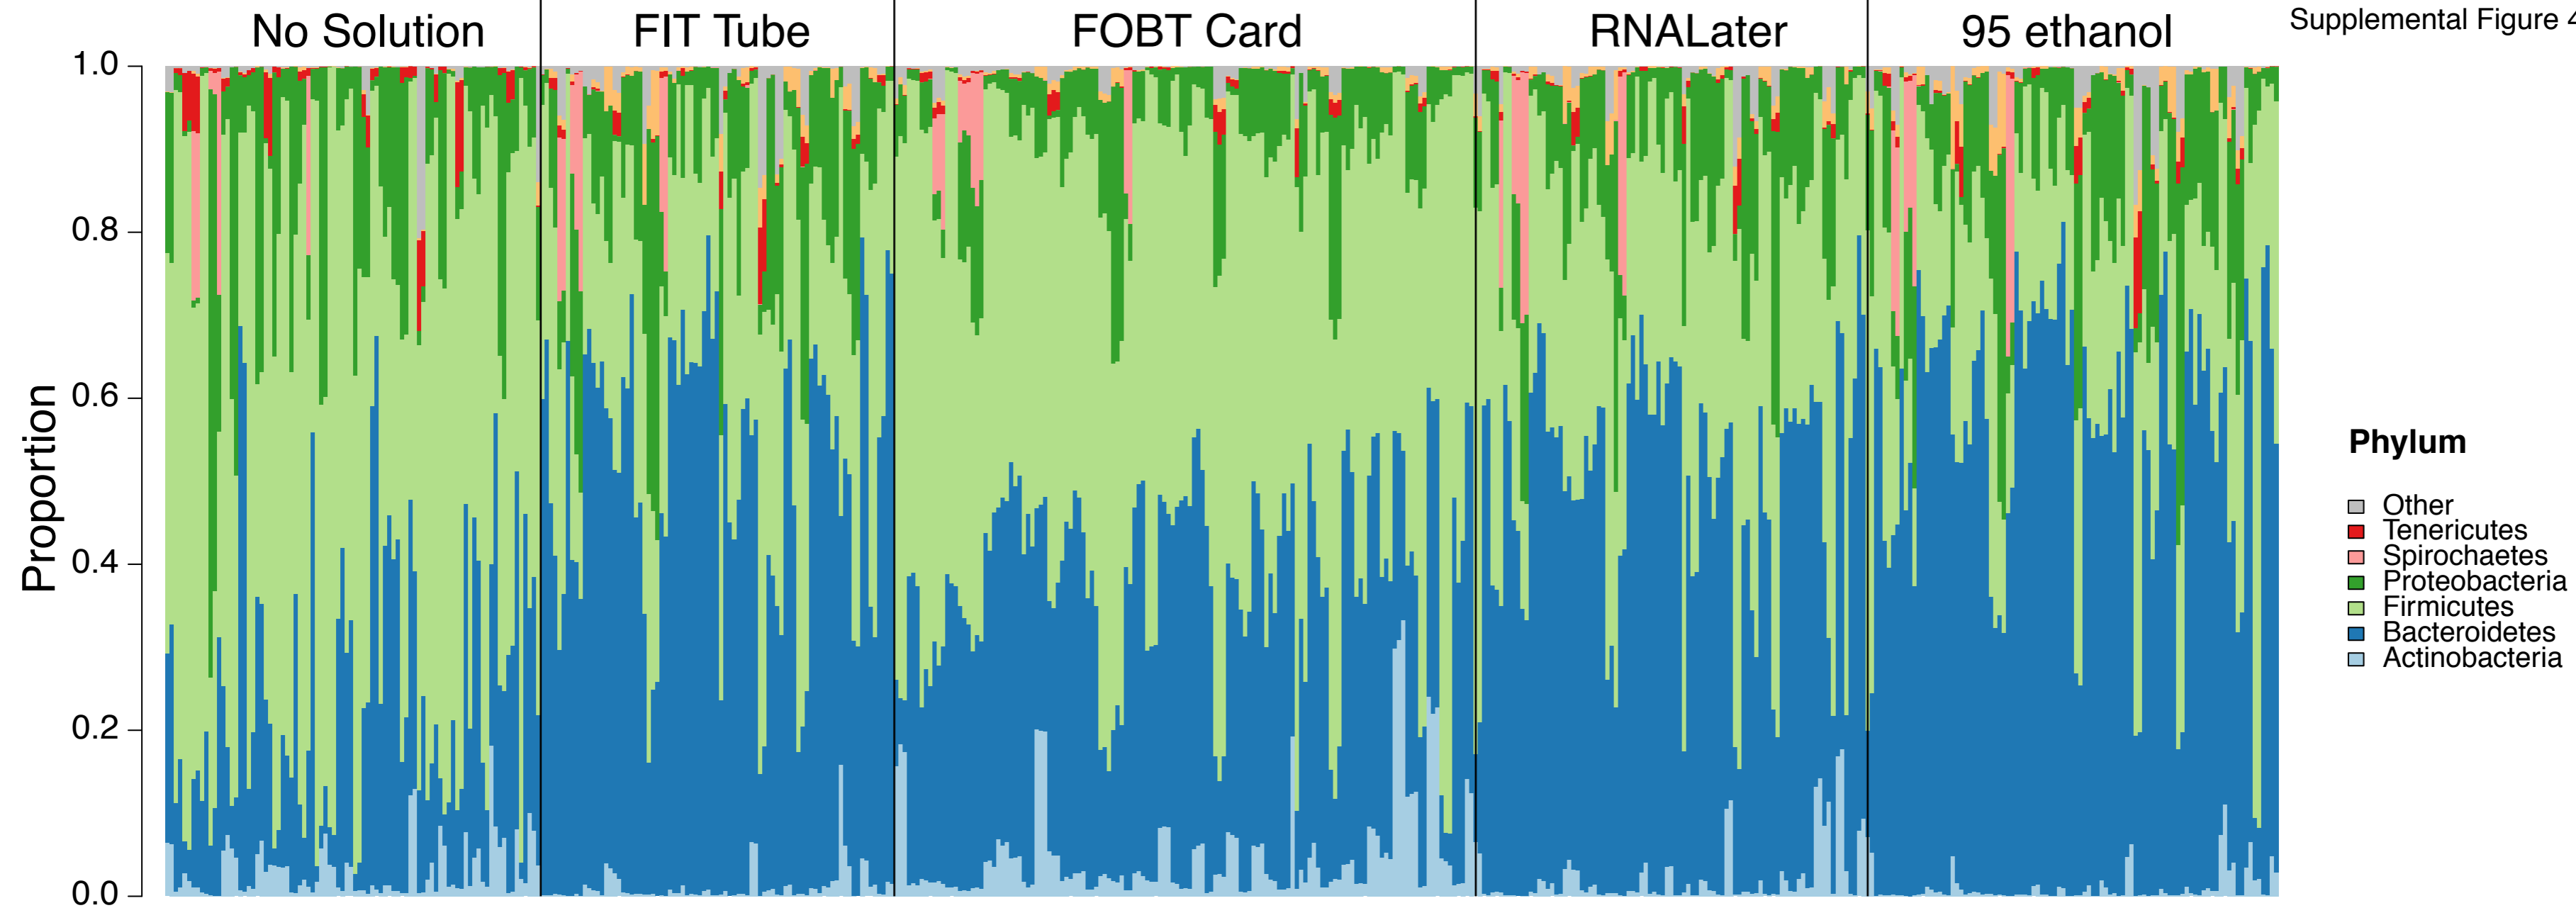

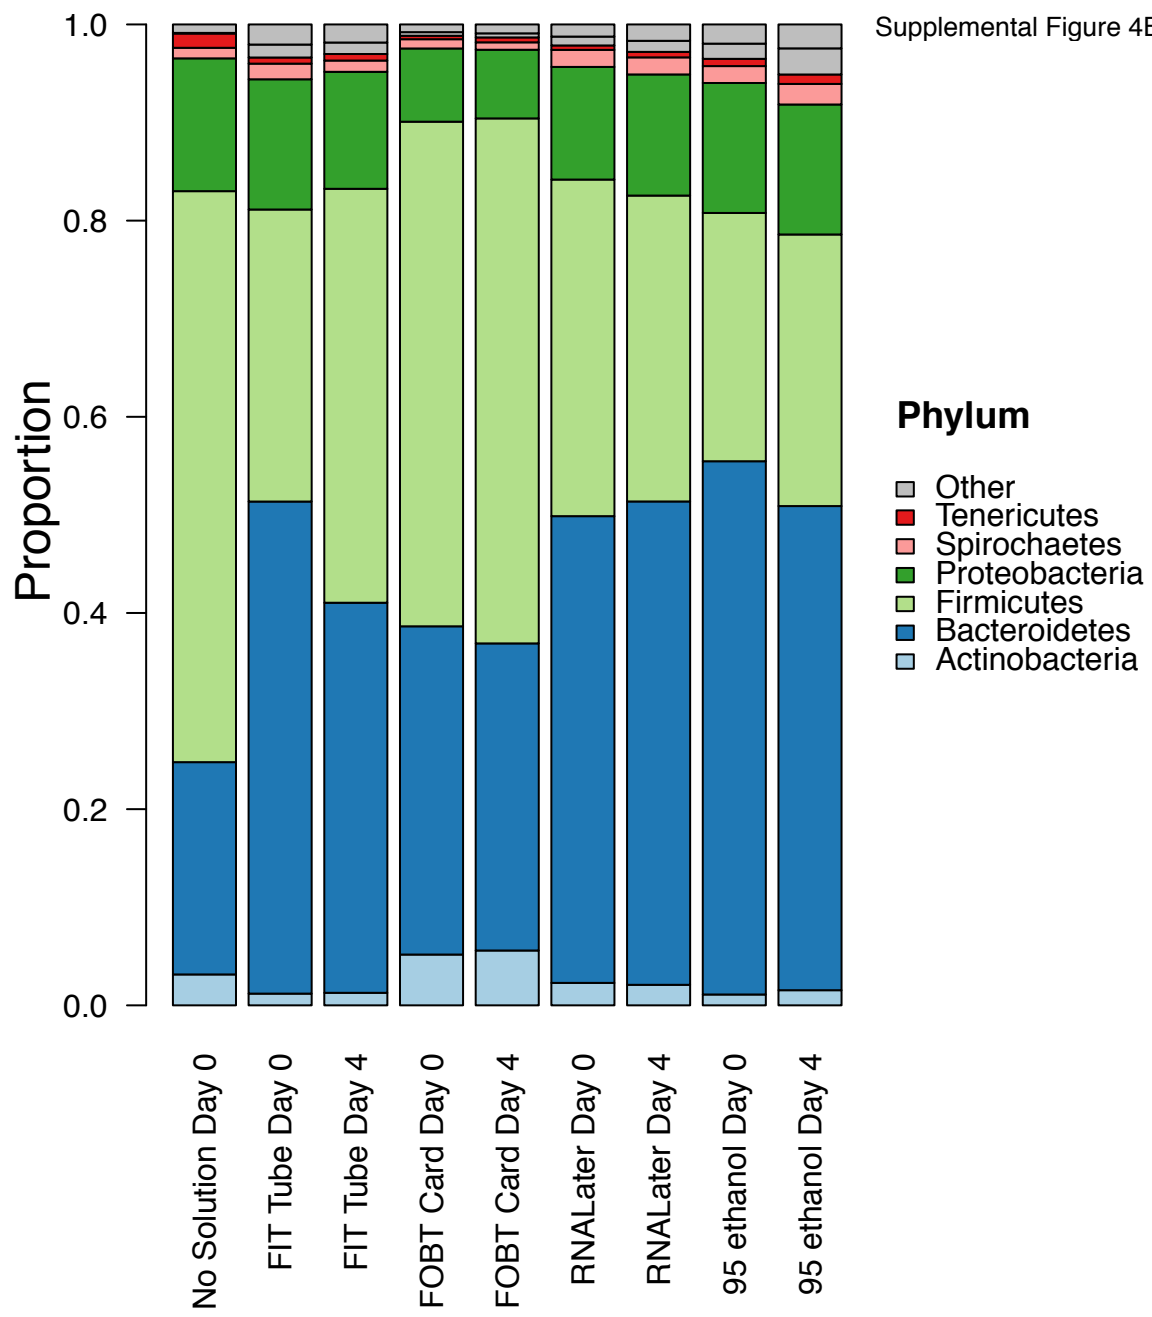



Day 0

Supplemental Figure 5A

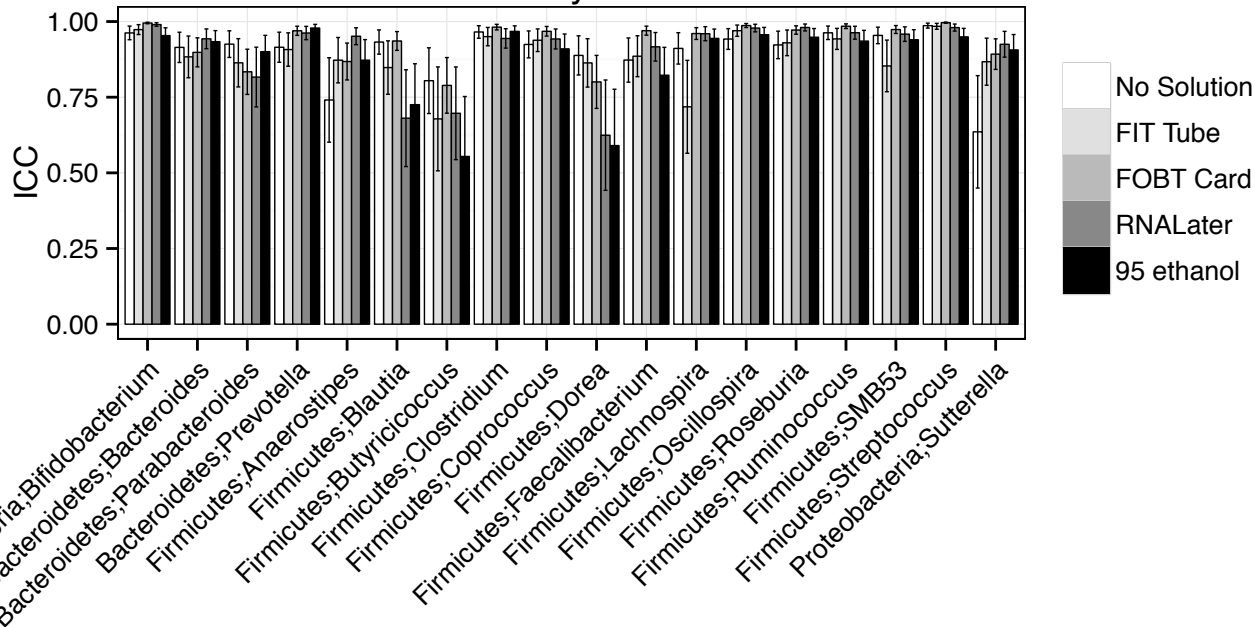

Day 4

Supplemental Figure 5B

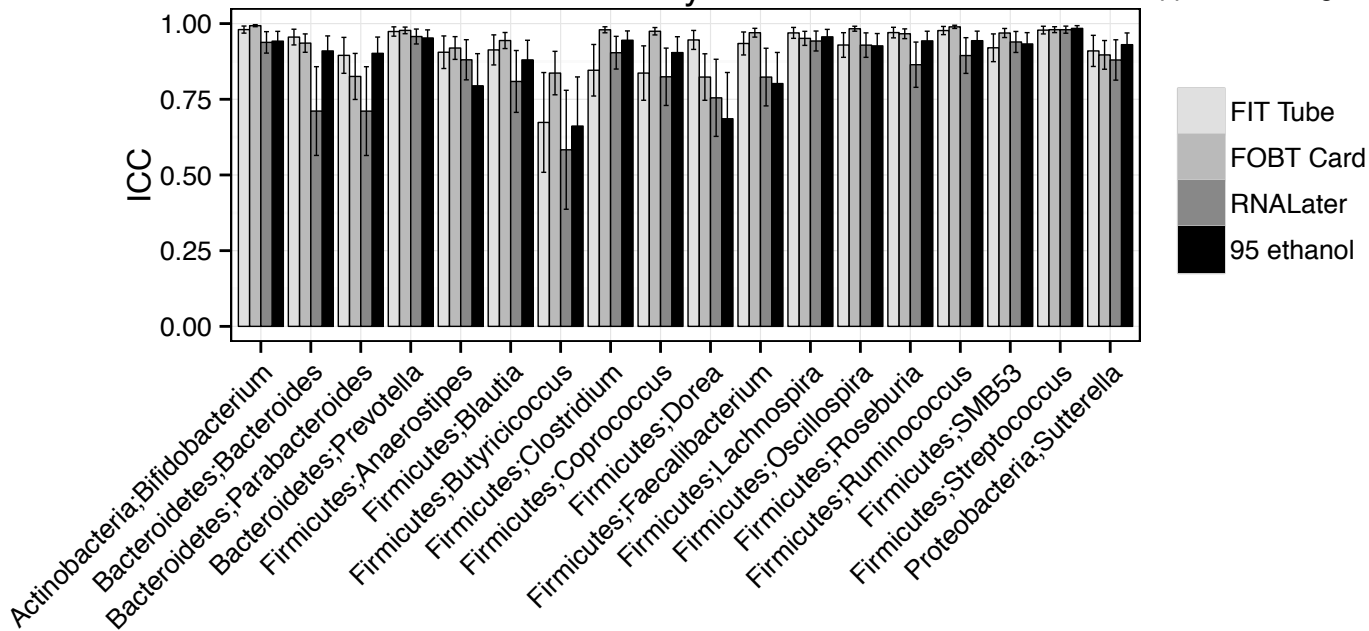

Supplemental Figure 6

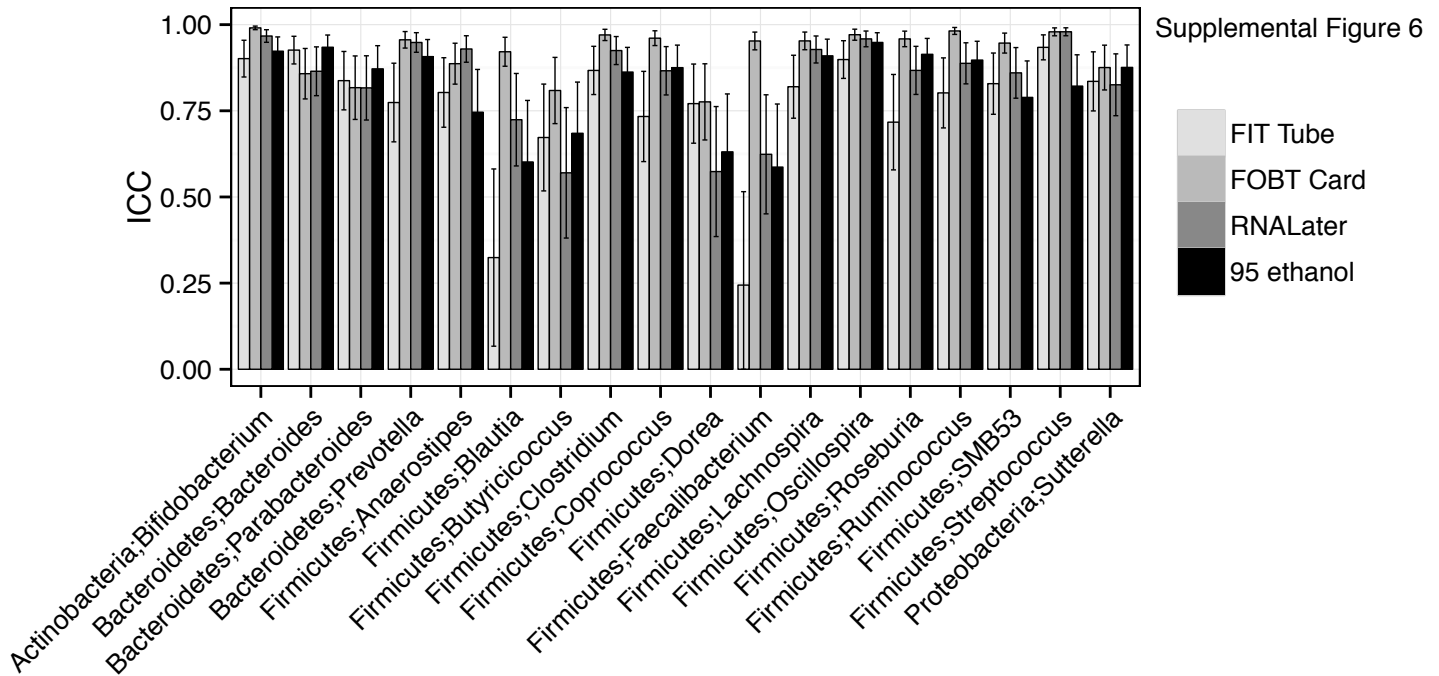

Supplemental Figure 7A

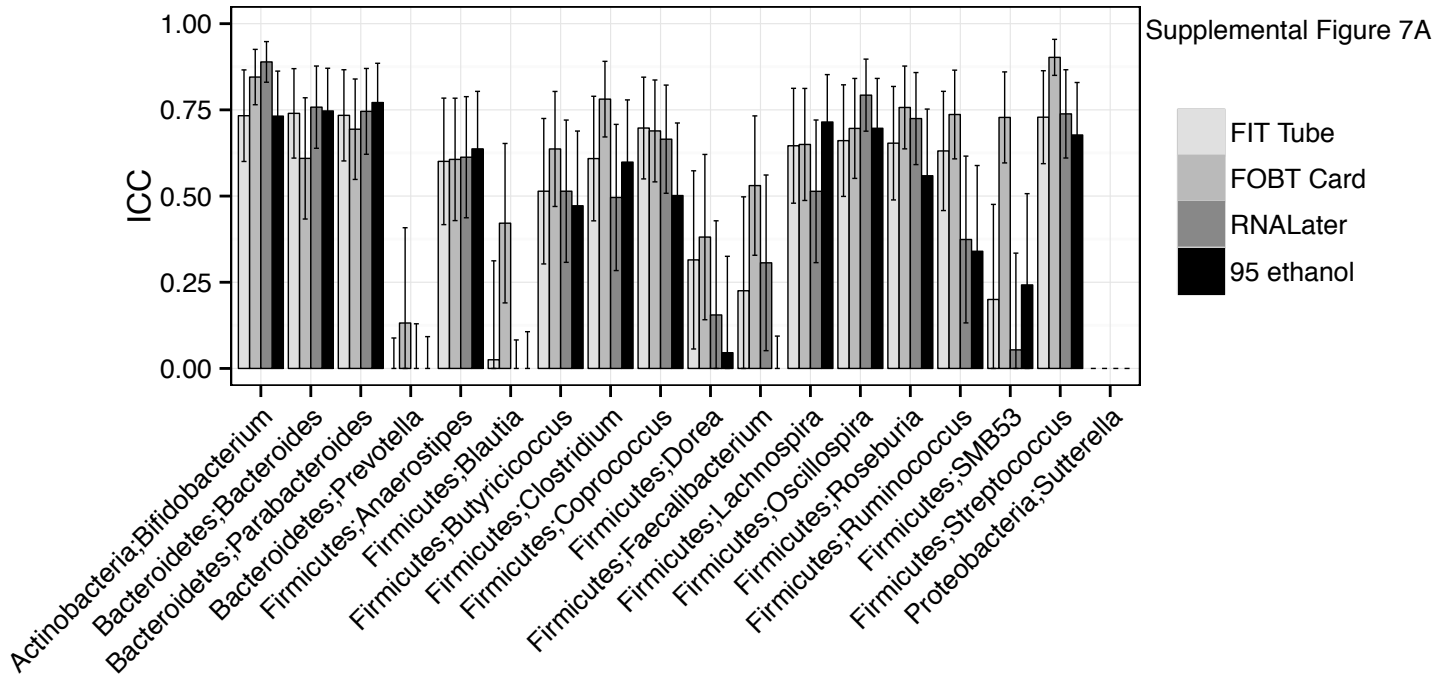

Supplemental Figure 7B

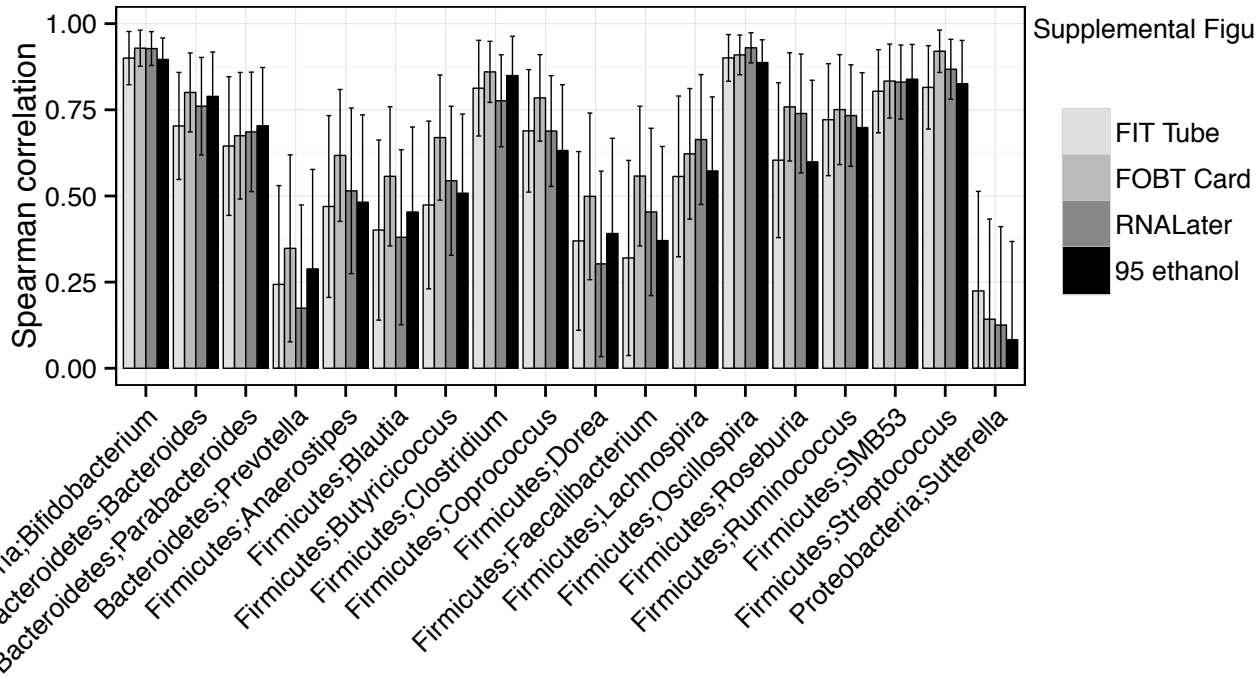

Supplement: AEM.00361-17_zam999117815s1.pdf [file AEM.00361-17_zam999117815s1.pdf]
